# Supplementary material
Source: MDPI journal article supplement (https://www.mdpi.com/2078-1547/8/1/11)
Supplement: s1 [file s1]

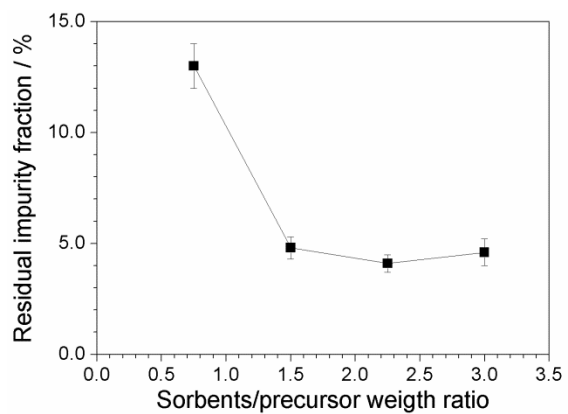

Purification route for RTIL precursors through sorbents and water

Effect of treatment/nature/content of sorbents and processing temperature/time

Impurity content detected by UV-Vis spectrophotometry

Correlation between absorbance and impurity content

Precursor purity level affects the electrochemical performance of ionic liquids
