# Supplementary material
Source: MDPI journal article supplement (https://www.mdpi.com/2078-1547/8/1/11)

## Supplementary Materials: About the Purification Route of Ionic Liquid Precursors

Massimo De Francesco , Elisabetta Simonetti , Gianremo Giorgi , Giovanni Battista Appetecchi \*

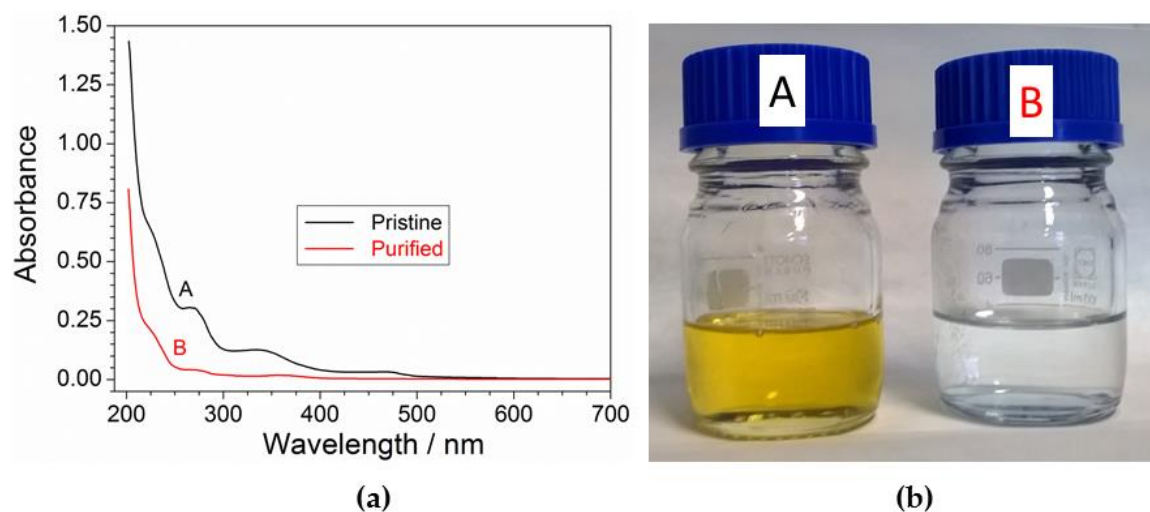

**Figure S1.** (a) Absorbance vs. wavelength dependence obtained from UV-VIS spectrometry measurements performed on ethanol solutions of pristine and purified PYR<sub>14</sub>TFSI ionic liquid. (b) Picture of pristine (A) and purified (B) PYR<sub>14</sub>TFSI ionic liquids.

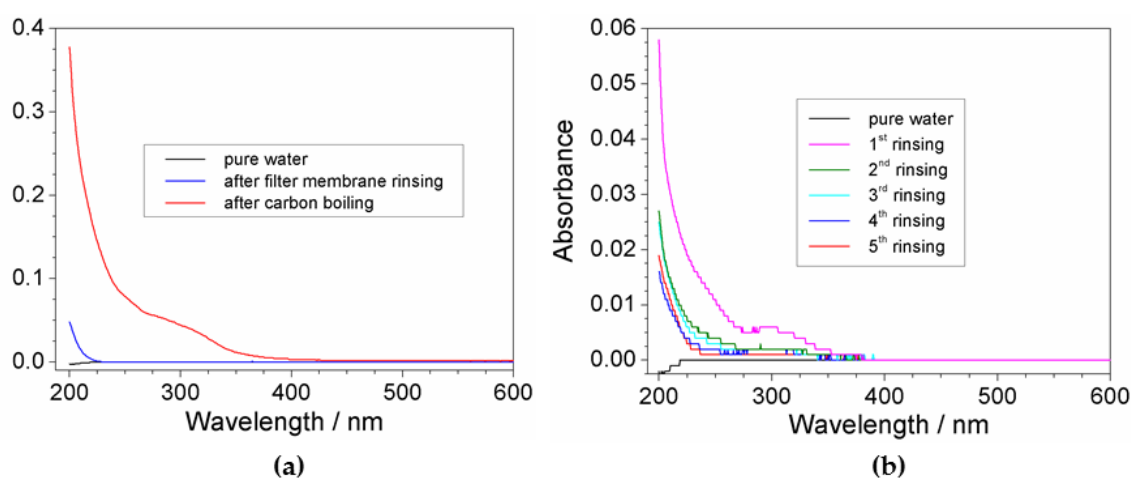

**Figure S2.** Absorbance vs. wavelength dependence for the aqueous phase collected (a) after activated carbon boiling and rinsing of the fresh filter membrane, respectively, and (b) after consecutive rinsing steps run on activated carbon. The pure deionized water baseline is reported for comparison purpose.

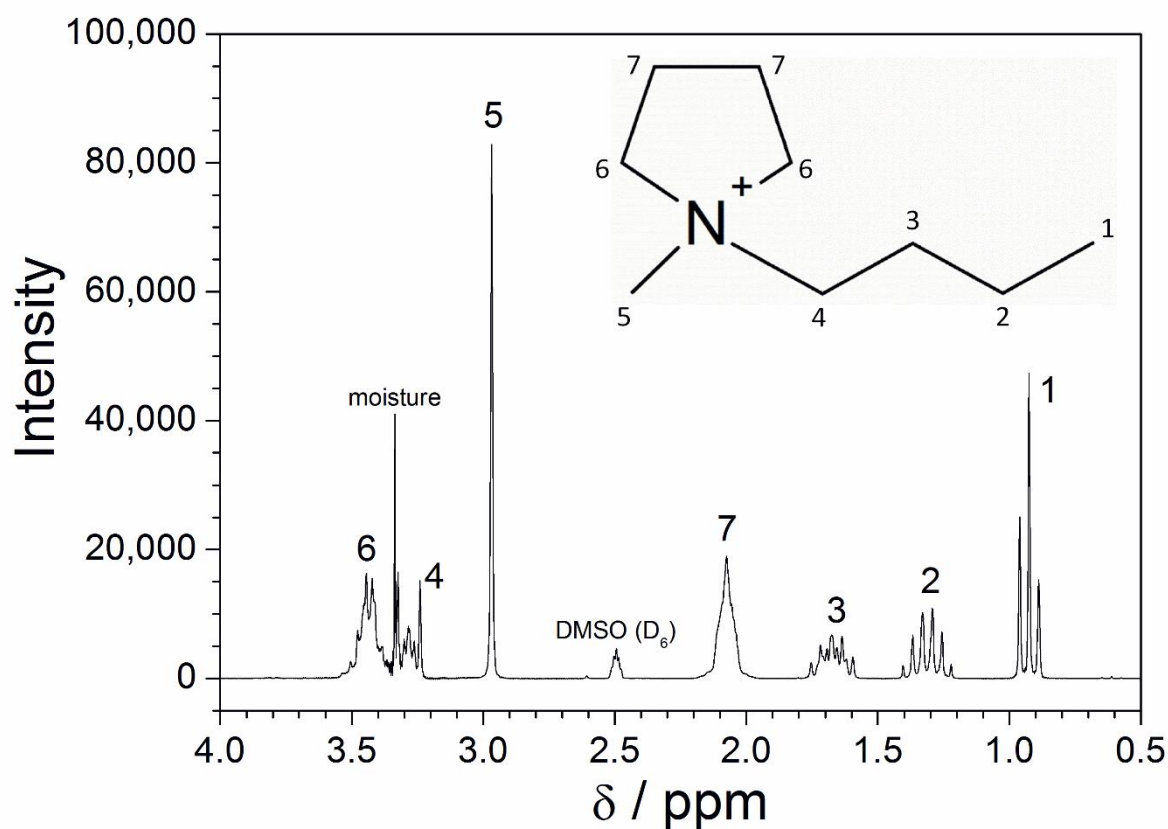

Figure S3.  $^1\text{H}$  NMR pattern of the PYR<sub>14</sub>TFSI ionic liquid.

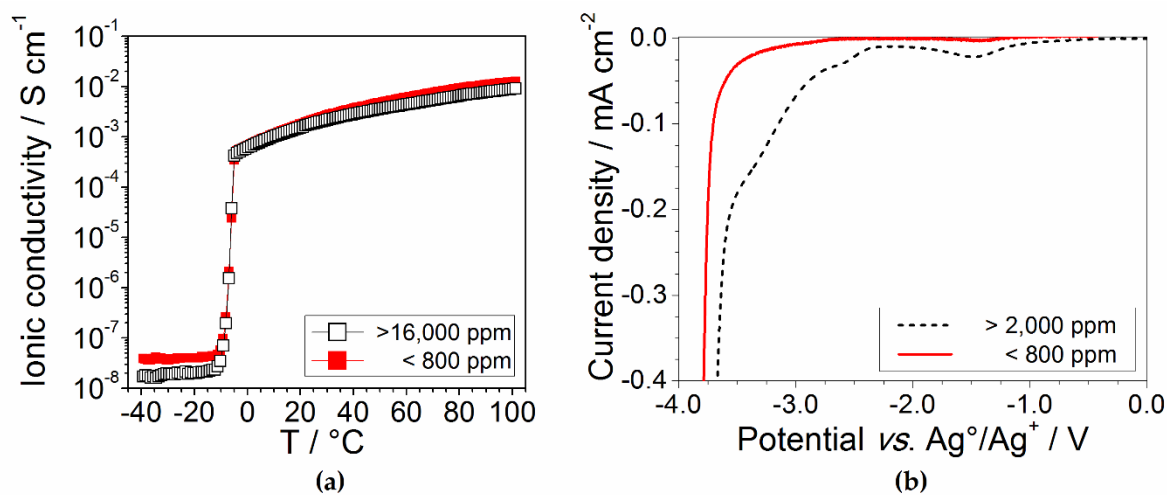

Figure S4. (a) Ionic conductivity vs. temperature dependence and (b) cathodic sweep voltammetry ( $5 \text{ mV s}^{-1}$  and  $20^\circ\text{C}$ ) of PYR<sub>14</sub>TFSI ionic liquids at different impurity contents.

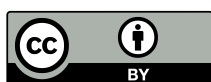

Supplement: s2 [file s2]
